# Supplementary material for: Measuring psychotherapeutic processes in the context of psychedelic experiences: Validation of the General Change Mechanisms Questionnaire (GCMQ)
Source: PubMed Central journal article supplement (PMC11102652; doi:10.1177/02698811241249698), 2024-05-14
Supplement: sj-pdf-2-jop-10.1177_02698811241249698.pdf [file sj-pdf-2-jop-10.1177_02698811241249698.pdf]

# General Change Mechanisms Questionnaire (GCMQ)

## Paper-and-Pencil Versions and Scoring Instructions

This document includes three versions of the GCMQ in English and German:

1. The **GCMQ-20** includes four scales Resource Activation (RA), Problem Actuation (PA), Clarification (CL), and Mastery (MA). The scale Relationship (RE) is not included in the GCMQ-20. The GCMQ-20 is therefore applicable to settings where no therapist or supporting person was present (e.g., recreational psychedelic use).
2. The **GCMQ-25-NC** (NC = nonclinical) includes all five scales (RA, PA, CL, MA, and RE). Items in the RE scale do not refer to “my therapist(s)”, but instead refer to “the person(s) I was with”. The GCMQ-25-NC is therefore applicable outside of formal clinical settings.
3. The **GCMQ-25-CL** (CL = clinical) includes all five scales (RA, PA, CL, MA, and RE). Items in the RE scale refer to “my therapist(s)”. The GCMQ-25-CL is therefore applicable to formal clinical settings.

Each item is scored on a 6-point Likert scale ranging from 0 (“not at all”) to 5 (“extremely”). Scores for the scales are calculated as the sum of all items of the respective scale. Item positions for the three GCMQ versions are listed in the following:

|                                               | Resource Activation (RA) | Problem Actuation (PA) | Clarification (CL) | Mastery (MA)     | Relationship (RE) |
|-----------------------------------------------|--------------------------|------------------------|--------------------|------------------|-------------------|
| <b>GCMQ-20</b>                                | 3, 6, 9, 14, 17          | 1, 8, 11, 15, 20       | 2, 5, 12, 16, 19   | 4, 7, 10, 13, 18 | —                 |
| <b>GCMQ-25-NC</b><br>and<br><b>GCMQ-25-CL</b> | 4, 7, 11, 18, 21         | 1, 9, 14, 19, 25       | 2, 6, 15, 20, 24   | 5, 8, 12, 16, 23 | 3, 10, 13, 17, 22 |

## GCMQ-20

Here is a list of statements that may apply to your experience. Please estimate the extent to which these statements apply to your experience.

|    |                                                                                              | not at all            | a little              | moderately            | strongly              | very strongly         | extremely             |
|----|----------------------------------------------------------------------------------------------|-----------------------|-----------------------|-----------------------|-----------------------|-----------------------|-----------------------|
| 1  | I felt emotions that are related to my problems.                                             | <input type="radio"/> | <input type="radio"/> | <input type="radio"/> | <input type="radio"/> | <input type="radio"/> | <input type="radio"/> |
| 2  | It became clearer to me what the essence of my problems is.                                  | <input type="radio"/> | <input type="radio"/> | <input type="radio"/> | <input type="radio"/> | <input type="radio"/> | <input type="radio"/> |
| 3  | I could see myself in a positive light.                                                      | <input type="radio"/> | <input type="radio"/> | <input type="radio"/> | <input type="radio"/> | <input type="radio"/> | <input type="radio"/> |
| 4  | I found new ways to deal with situations that have caused me problems in the past.           | <input type="radio"/> | <input type="radio"/> | <input type="radio"/> | <input type="radio"/> | <input type="radio"/> | <input type="radio"/> |
| 5  | I could see my problems in a new light.                                                      | <input type="radio"/> | <input type="radio"/> | <input type="radio"/> | <input type="radio"/> | <input type="radio"/> | <input type="radio"/> |
| 6  | I became aware of the beautiful things in my life.                                           | <input type="radio"/> | <input type="radio"/> | <input type="radio"/> | <input type="radio"/> | <input type="radio"/> | <input type="radio"/> |
| 7  | I gained confidence in my ability to handle strong feelings.                                 | <input type="radio"/> | <input type="radio"/> | <input type="radio"/> | <input type="radio"/> | <input type="radio"/> | <input type="radio"/> |
| 8  | I was confronted with my problems.                                                           | <input type="radio"/> | <input type="radio"/> | <input type="radio"/> | <input type="radio"/> | <input type="radio"/> | <input type="radio"/> |
| 9  | I felt in contact with my strengths.                                                         | <input type="radio"/> | <input type="radio"/> | <input type="radio"/> | <input type="radio"/> | <input type="radio"/> | <input type="radio"/> |
| 10 | I made progress in coping with my problems.                                                  | <input type="radio"/> | <input type="radio"/> | <input type="radio"/> | <input type="radio"/> | <input type="radio"/> | <input type="radio"/> |
| 11 | I experienced feelings that I previously avoided.                                            | <input type="radio"/> | <input type="radio"/> | <input type="radio"/> | <input type="radio"/> | <input type="radio"/> | <input type="radio"/> |
| 12 | It became clearer to me why I tend to react in certain ways to certain difficult situations. | <input type="radio"/> | <input type="radio"/> | <input type="radio"/> | <input type="radio"/> | <input type="radio"/> | <input type="radio"/> |

**Please also complete the next page →**

|    |                                                                | not at all            | a little              | moderately            | strongly              | very strongly         | extremely             |
|----|----------------------------------------------------------------|-----------------------|-----------------------|-----------------------|-----------------------|-----------------------|-----------------------|
| 13 | I learned about new and useful ways to act.                    | <input type="radio"/> | <input type="radio"/> | <input type="radio"/> | <input type="radio"/> | <input type="radio"/> | <input type="radio"/> |
| 14 | I felt connected to things that give my life meaning.          | <input type="radio"/> | <input type="radio"/> | <input type="radio"/> | <input type="radio"/> | <input type="radio"/> | <input type="radio"/> |
| 15 | I relived painful or fearful memories.                         | <input type="radio"/> | <input type="radio"/> | <input type="radio"/> | <input type="radio"/> | <input type="radio"/> | <input type="radio"/> |
| 16 | I gained a new understanding of the difficulties in my life.   | <input type="radio"/> | <input type="radio"/> | <input type="radio"/> | <input type="radio"/> | <input type="radio"/> | <input type="radio"/> |
| 17 | I became aware of things that I am thankful for.               | <input type="radio"/> | <input type="radio"/> | <input type="radio"/> | <input type="radio"/> | <input type="radio"/> | <input type="radio"/> |
| 18 | I learned things that can help me handle difficult situations. | <input type="radio"/> | <input type="radio"/> | <input type="radio"/> | <input type="radio"/> | <input type="radio"/> | <input type="radio"/> |
| 19 | I could understand my feelings on a deeper level.              | <input type="radio"/> | <input type="radio"/> | <input type="radio"/> | <input type="radio"/> | <input type="radio"/> | <input type="radio"/> |
| 20 | I could feel that my vulnerable spots were being touched upon. | <input type="radio"/> | <input type="radio"/> | <input type="radio"/> | <input type="radio"/> | <input type="radio"/> | <input type="radio"/> |

## GCMQ-20

Hier ist eine Liste von Aussagen, die möglicherweise auf Ihre Erfahrung zutreffen. Bitte schätzen Sie den Umfang ein, in dem diese Aussagen auf Ihre Erfahrung zutreffen.

|    |                                                                                                                        | überhaupt nicht       | ein wenig             | mäßig                 | stark                 | sehr stark            | extrem                |
|----|------------------------------------------------------------------------------------------------------------------------|-----------------------|-----------------------|-----------------------|-----------------------|-----------------------|-----------------------|
| 1  | Ich spürte Emotionen, die mit meinen Problemen zusammenhängen.                                                         | <input type="radio"/> | <input type="radio"/> | <input type="radio"/> | <input type="radio"/> | <input type="radio"/> | <input type="radio"/> |
| 2  | Es wurde mir klarer, was der Kern meiner Probleme ist.                                                                 | <input type="radio"/> | <input type="radio"/> | <input type="radio"/> | <input type="radio"/> | <input type="radio"/> | <input type="radio"/> |
| 3  | Ich konnte mich selbst in einem positiven Licht sehen.                                                                 | <input type="radio"/> | <input type="radio"/> | <input type="radio"/> | <input type="radio"/> | <input type="radio"/> | <input type="radio"/> |
| 4  | Ich habe neue Wege gefunden, mit Situationen umzugehen, die mir in der Vergangenheit Probleme gemacht haben.           | <input type="radio"/> | <input type="radio"/> | <input type="radio"/> | <input type="radio"/> | <input type="radio"/> | <input type="radio"/> |
| 5  | Ich konnte meine Probleme in einem neuen Licht sehen.                                                                  | <input type="radio"/> | <input type="radio"/> | <input type="radio"/> | <input type="radio"/> | <input type="radio"/> | <input type="radio"/> |
| 6  | Ich bin mir der schönen Dinge in meinem Leben bewusst geworden.                                                        | <input type="radio"/> | <input type="radio"/> | <input type="radio"/> | <input type="radio"/> | <input type="radio"/> | <input type="radio"/> |
| 7  | Ich habe Vertrauen in meine Fähigkeit gewonnen, mit starken Gefühlen umzugehen.                                        | <input type="radio"/> | <input type="radio"/> | <input type="radio"/> | <input type="radio"/> | <input type="radio"/> | <input type="radio"/> |
| 8  | Ich wurde mit meinen Problemen konfrontiert.                                                                           | <input type="radio"/> | <input type="radio"/> | <input type="radio"/> | <input type="radio"/> | <input type="radio"/> | <input type="radio"/> |
| 9  | Ich fühlte mich im Kontakt mit meinen Stärken.                                                                         | <input type="radio"/> | <input type="radio"/> | <input type="radio"/> | <input type="radio"/> | <input type="radio"/> | <input type="radio"/> |
| 10 | Ich habe Fortschritte bei der Bewältigung meiner Probleme gemacht.                                                     | <input type="radio"/> | <input type="radio"/> | <input type="radio"/> | <input type="radio"/> | <input type="radio"/> | <input type="radio"/> |
| 11 | Ich habe Gefühle erlebt, die ich zuvor vermieden habe.                                                                 | <input type="radio"/> | <input type="radio"/> | <input type="radio"/> | <input type="radio"/> | <input type="radio"/> | <input type="radio"/> |
| 12 | Mir ist klarer geworden, warum ich in bestimmten schwierigen Situationen dazu neige, auf bestimmte Weise zu reagieren. | <input type="radio"/> | <input type="radio"/> | <input type="radio"/> | <input type="radio"/> | <input type="radio"/> | <input type="radio"/> |

**Bitte füllen Sie auch die nächste Seite aus →**

|    |                                                                                             | überhaupt<br>nicht    | ein wenig             | mäßig                 | stark                 | sehr stark            | extrem                |
|----|---------------------------------------------------------------------------------------------|-----------------------|-----------------------|-----------------------|-----------------------|-----------------------|-----------------------|
| 13 | Ich habe nützliche neue Handlungsmöglichkeiten kennengelernt.                               | <input type="radio"/> | <input type="radio"/> | <input type="radio"/> | <input type="radio"/> | <input type="radio"/> | <input type="radio"/> |
| 14 | Ich habe mich Dingen verbunden gefühlt, die meinem Leben Sinn geben.                        | <input type="radio"/> | <input type="radio"/> | <input type="radio"/> | <input type="radio"/> | <input type="radio"/> | <input type="radio"/> |
| 15 | Ich habe schmerzhaft oder angstvolle Erinnerungen wiedererlebt.                             | <input type="radio"/> | <input type="radio"/> | <input type="radio"/> | <input type="radio"/> | <input type="radio"/> | <input type="radio"/> |
| 16 | Ich habe ein neues Verständnis für die Schwierigkeiten in meinem Leben gewonnen.            | <input type="radio"/> | <input type="radio"/> | <input type="radio"/> | <input type="radio"/> | <input type="radio"/> | <input type="radio"/> |
| 17 | Mir wurden Dinge bewusst, für die ich dankbar bin.                                          | <input type="radio"/> | <input type="radio"/> | <input type="radio"/> | <input type="radio"/> | <input type="radio"/> | <input type="radio"/> |
| 18 | Ich habe Dinge gelernt, die mir dabei helfen können, mit schwierigen Situationen umzugehen. | <input type="radio"/> | <input type="radio"/> | <input type="radio"/> | <input type="radio"/> | <input type="radio"/> | <input type="radio"/> |
| 19 | Ich konnte meine Gefühle auf einer tieferen Ebene verstehen.                                | <input type="radio"/> | <input type="radio"/> | <input type="radio"/> | <input type="radio"/> | <input type="radio"/> | <input type="radio"/> |
| 20 | Ich konnte spüren, dass meine verletzlichen Stellen berührt wurden.                         | <input type="radio"/> | <input type="radio"/> | <input type="radio"/> | <input type="radio"/> | <input type="radio"/> | <input type="radio"/> |

## GCMQ-25-NC

Here is a list of statements that may apply to your experience. Please estimate the extent to which these statements apply to your experience.

|    |                                                                                    | not at all            | a little              | moderately            | strongly              | very strongly         | extremely             |
|----|------------------------------------------------------------------------------------|-----------------------|-----------------------|-----------------------|-----------------------|-----------------------|-----------------------|
| 1  | I felt emotions that are related to my problems.                                   | <input type="radio"/> | <input type="radio"/> | <input type="radio"/> | <input type="radio"/> | <input type="radio"/> | <input type="radio"/> |
| 2  | It became clearer to me what the essence of my problems is.                        | <input type="radio"/> | <input type="radio"/> | <input type="radio"/> | <input type="radio"/> | <input type="radio"/> | <input type="radio"/> |
| 3  | I could trust the person(s) I was with.                                            | <input type="radio"/> | <input type="radio"/> | <input type="radio"/> | <input type="radio"/> | <input type="radio"/> | <input type="radio"/> |
| 4  | I could see myself in a positive light.                                            | <input type="radio"/> | <input type="radio"/> | <input type="radio"/> | <input type="radio"/> | <input type="radio"/> | <input type="radio"/> |
| 5  | I found new ways to deal with situations that have caused me problems in the past. | <input type="radio"/> | <input type="radio"/> | <input type="radio"/> | <input type="radio"/> | <input type="radio"/> | <input type="radio"/> |
| 6  | I could see my problems in a new light.                                            | <input type="radio"/> | <input type="radio"/> | <input type="radio"/> | <input type="radio"/> | <input type="radio"/> | <input type="radio"/> |
| 7  | I became aware of the beautiful things in my life.                                 | <input type="radio"/> | <input type="radio"/> | <input type="radio"/> | <input type="radio"/> | <input type="radio"/> | <input type="radio"/> |
| 8  | I gained confidence in my ability to handle strong feelings.                       | <input type="radio"/> | <input type="radio"/> | <input type="radio"/> | <input type="radio"/> | <input type="radio"/> | <input type="radio"/> |
| 9  | I was confronted with my problems.                                                 | <input type="radio"/> | <input type="radio"/> | <input type="radio"/> | <input type="radio"/> | <input type="radio"/> | <input type="radio"/> |
| 10 | I felt comfortable with the person(s) I was with.                                  | <input type="radio"/> | <input type="radio"/> | <input type="radio"/> | <input type="radio"/> | <input type="radio"/> | <input type="radio"/> |
| 11 | I felt in contact with my strengths.                                               | <input type="radio"/> | <input type="radio"/> | <input type="radio"/> | <input type="radio"/> | <input type="radio"/> | <input type="radio"/> |
| 12 | I made progress in coping with my problems.                                        | <input type="radio"/> | <input type="radio"/> | <input type="radio"/> | <input type="radio"/> | <input type="radio"/> | <input type="radio"/> |

**Please also complete the next page →**

|    |                                                                                              | not at all            | a little              | moderately            | strongly              | very strongly         | extremely             |
|----|----------------------------------------------------------------------------------------------|-----------------------|-----------------------|-----------------------|-----------------------|-----------------------|-----------------------|
| 13 | I felt supported by the person(s) I was with.                                                | <input type="radio"/> | <input type="radio"/> | <input type="radio"/> | <input type="radio"/> | <input type="radio"/> | <input type="radio"/> |
| 14 | I experienced feelings that I previously avoided.                                            | <input type="radio"/> | <input type="radio"/> | <input type="radio"/> | <input type="radio"/> | <input type="radio"/> | <input type="radio"/> |
| 15 | It became clearer to me why I tend to react in certain ways to certain difficult situations. | <input type="radio"/> | <input type="radio"/> | <input type="radio"/> | <input type="radio"/> | <input type="radio"/> | <input type="radio"/> |
| 16 | I learned about new and useful ways to act.                                                  | <input type="radio"/> | <input type="radio"/> | <input type="radio"/> | <input type="radio"/> | <input type="radio"/> | <input type="radio"/> |
| 17 | I felt safe with the person(s) I was with.                                                   | <input type="radio"/> | <input type="radio"/> | <input type="radio"/> | <input type="radio"/> | <input type="radio"/> | <input type="radio"/> |
| 18 | I felt connected to things that give my life meaning.                                        | <input type="radio"/> | <input type="radio"/> | <input type="radio"/> | <input type="radio"/> | <input type="radio"/> | <input type="radio"/> |
| 19 | I relived painful or fearful memories.                                                       | <input type="radio"/> | <input type="radio"/> | <input type="radio"/> | <input type="radio"/> | <input type="radio"/> | <input type="radio"/> |
| 20 | I gained a new understanding of the difficulties in my life.                                 | <input type="radio"/> | <input type="radio"/> | <input type="radio"/> | <input type="radio"/> | <input type="radio"/> | <input type="radio"/> |
| 21 | I became aware of things that I am thankful for.                                             | <input type="radio"/> | <input type="radio"/> | <input type="radio"/> | <input type="radio"/> | <input type="radio"/> | <input type="radio"/> |
| 22 | I felt connected to the person(s) I was with.                                                | <input type="radio"/> | <input type="radio"/> | <input type="radio"/> | <input type="radio"/> | <input type="radio"/> | <input type="radio"/> |
| 23 | I learned things that can help me handle difficult situations.                               | <input type="radio"/> | <input type="radio"/> | <input type="radio"/> | <input type="radio"/> | <input type="radio"/> | <input type="radio"/> |
| 24 | I could understand my feelings on a deeper level.                                            | <input type="radio"/> | <input type="radio"/> | <input type="radio"/> | <input type="radio"/> | <input type="radio"/> | <input type="radio"/> |
| 25 | I could feel that my vulnerable spots were being touched upon.                               | <input type="radio"/> | <input type="radio"/> | <input type="radio"/> | <input type="radio"/> | <input type="radio"/> | <input type="radio"/> |

## GCMQ-25-NC

Hier ist eine Liste von Aussagen, die möglicherweise auf Ihre Erfahrung zutreffen. Bitte schätzen Sie den Umfang ein, in dem diese Aussagen auf Ihre Erfahrung zutreffen.

|    |                                                                                                              | überhaupt nicht       | ein wenig             | mäßig                 | stark                 | sehr stark            | extrem                |
|----|--------------------------------------------------------------------------------------------------------------|-----------------------|-----------------------|-----------------------|-----------------------|-----------------------|-----------------------|
| 1  | Ich spürte Emotionen, die mit meinen Problemen zusammenhängen.                                               | <input type="radio"/> | <input type="radio"/> | <input type="radio"/> | <input type="radio"/> | <input type="radio"/> | <input type="radio"/> |
| 2  | Es wurde mir klarer, was der Kern meiner Probleme ist.                                                       | <input type="radio"/> | <input type="radio"/> | <input type="radio"/> | <input type="radio"/> | <input type="radio"/> | <input type="radio"/> |
| 3  | Ich konnte der Person/den Personen, die bei mir war(en), vertrauen.                                          | <input type="radio"/> | <input type="radio"/> | <input type="radio"/> | <input type="radio"/> | <input type="radio"/> | <input type="radio"/> |
| 4  | Ich konnte mich selbst in einem positiven Licht sehen.                                                       | <input type="radio"/> | <input type="radio"/> | <input type="radio"/> | <input type="radio"/> | <input type="radio"/> | <input type="radio"/> |
| 5  | Ich habe neue Wege gefunden, mit Situationen umzugehen, die mir in der Vergangenheit Probleme gemacht haben. | <input type="radio"/> | <input type="radio"/> | <input type="radio"/> | <input type="radio"/> | <input type="radio"/> | <input type="radio"/> |
| 6  | Ich konnte meine Probleme in einem neuen Licht sehen.                                                        | <input type="radio"/> | <input type="radio"/> | <input type="radio"/> | <input type="radio"/> | <input type="radio"/> | <input type="radio"/> |
| 7  | Ich bin mir der schönen Dinge in meinem Leben bewusst geworden.                                              | <input type="radio"/> | <input type="radio"/> | <input type="radio"/> | <input type="radio"/> | <input type="radio"/> | <input type="radio"/> |
| 8  | Ich habe Vertrauen in meine Fähigkeit gewonnen, mit starken Gefühlen umzugehen.                              | <input type="radio"/> | <input type="radio"/> | <input type="radio"/> | <input type="radio"/> | <input type="radio"/> | <input type="radio"/> |
| 9  | Ich wurde mit meinen Problemen konfrontiert.                                                                 | <input type="radio"/> | <input type="radio"/> | <input type="radio"/> | <input type="radio"/> | <input type="radio"/> | <input type="radio"/> |
| 10 | Ich habe mich mit der Person/den Personen, die bei mir war(en), wohl gefühlt.                                | <input type="radio"/> | <input type="radio"/> | <input type="radio"/> | <input type="radio"/> | <input type="radio"/> | <input type="radio"/> |
| 11 | Ich fühlte mich im Kontakt mit meinen Stärken.                                                               | <input type="radio"/> | <input type="radio"/> | <input type="radio"/> | <input type="radio"/> | <input type="radio"/> | <input type="radio"/> |
| 12 | Ich habe Fortschritte bei der Bewältigung meiner Probleme gemacht.                                           | <input type="radio"/> | <input type="radio"/> | <input type="radio"/> | <input type="radio"/> | <input type="radio"/> | <input type="radio"/> |

**Bitte füllen Sie auch die nächste Seite aus →**



|    |                                                                                                                        | überhaupt<br>nicht    | ein wenig             | mäßig                 | stark                 | sehr stark            | extrem                |
|----|------------------------------------------------------------------------------------------------------------------------|-----------------------|-----------------------|-----------------------|-----------------------|-----------------------|-----------------------|
| 13 | Ich habe mich von der Person/den Personen, die bei mir war(en), unterstützt gefühlt.                                   | <input type="radio"/> | <input type="radio"/> | <input type="radio"/> | <input type="radio"/> | <input type="radio"/> | <input type="radio"/> |
| 14 | Ich habe Gefühle erlebt, die ich zuvor vermieden habe.                                                                 | <input type="radio"/> | <input type="radio"/> | <input type="radio"/> | <input type="radio"/> | <input type="radio"/> | <input type="radio"/> |
| 15 | Mir ist klarer geworden, warum ich in bestimmten schwierigen Situationen dazu neige, auf bestimmte Weise zu reagieren. | <input type="radio"/> | <input type="radio"/> | <input type="radio"/> | <input type="radio"/> | <input type="radio"/> | <input type="radio"/> |
| 16 | Ich habe nützliche neue Handlungsmöglichkeiten kennengelernt.                                                          | <input type="radio"/> | <input type="radio"/> | <input type="radio"/> | <input type="radio"/> | <input type="radio"/> | <input type="radio"/> |
| 17 | Ich habe mich sicher gefühlt mit der Person/den Personen, die bei mir war(en).                                         | <input type="radio"/> | <input type="radio"/> | <input type="radio"/> | <input type="radio"/> | <input type="radio"/> | <input type="radio"/> |
| 18 | Ich habe mich Dingen verbunden gefühlt, die meinem Leben Sinn geben.                                                   | <input type="radio"/> | <input type="radio"/> | <input type="radio"/> | <input type="radio"/> | <input type="radio"/> | <input type="radio"/> |
| 19 | Ich habe schmerzhaft oder angstvolle Erinnerungen wiedererlebt.                                                        | <input type="radio"/> | <input type="radio"/> | <input type="radio"/> | <input type="radio"/> | <input type="radio"/> | <input type="radio"/> |
| 20 | Ich habe ein neues Verständnis für die Schwierigkeiten in meinem Leben gewonnen.                                       | <input type="radio"/> | <input type="radio"/> | <input type="radio"/> | <input type="radio"/> | <input type="radio"/> | <input type="radio"/> |
| 21 | Mir wurden Dinge bewusst, für die ich dankbar bin.                                                                     | <input type="radio"/> | <input type="radio"/> | <input type="radio"/> | <input type="radio"/> | <input type="radio"/> | <input type="radio"/> |
| 22 | Ich habe mich mit der Person/den Personen, die bei mir war(en), verbunden gefühlt.                                     | <input type="radio"/> | <input type="radio"/> | <input type="radio"/> | <input type="radio"/> | <input type="radio"/> | <input type="radio"/> |
| 23 | Ich habe Dinge gelernt, die mir dabei helfen können, mit schwierigen Situationen umzugehen.                            | <input type="radio"/> | <input type="radio"/> | <input type="radio"/> | <input type="radio"/> | <input type="radio"/> | <input type="radio"/> |
| 24 | Ich konnte meine Gefühle auf einer tieferen Ebene verstehen.                                                           | <input type="radio"/> | <input type="radio"/> | <input type="radio"/> | <input type="radio"/> | <input type="radio"/> | <input type="radio"/> |
| 25 | Ich konnte spüren, dass meine verletzlichen Stellen berührt wurden.                                                    | <input type="radio"/> | <input type="radio"/> | <input type="radio"/> | <input type="radio"/> | <input type="radio"/> | <input type="radio"/> |

## GCMQ-25-CL

Here is a list of statements that may apply to your therapy session. Please estimate the extent to which these statements apply to your therapy session.

|    |                                                                                    | not at all            | a little              | moderately            | strongly              | very strongly         | extremely             |
|----|------------------------------------------------------------------------------------|-----------------------|-----------------------|-----------------------|-----------------------|-----------------------|-----------------------|
| 1  | I felt emotions that are related to my problems.                                   | <input type="radio"/> | <input type="radio"/> | <input type="radio"/> | <input type="radio"/> | <input type="radio"/> | <input type="radio"/> |
| 2  | It became clearer to me what the essence of my problems is.                        | <input type="radio"/> | <input type="radio"/> | <input type="radio"/> | <input type="radio"/> | <input type="radio"/> | <input type="radio"/> |
| 3  | I could trust my therapist(s).                                                     | <input type="radio"/> | <input type="radio"/> | <input type="radio"/> | <input type="radio"/> | <input type="radio"/> | <input type="radio"/> |
| 4  | I could see myself in a positive light.                                            | <input type="radio"/> | <input type="radio"/> | <input type="radio"/> | <input type="radio"/> | <input type="radio"/> | <input type="radio"/> |
| 5  | I found new ways to deal with situations that have caused me problems in the past. | <input type="radio"/> | <input type="radio"/> | <input type="radio"/> | <input type="radio"/> | <input type="radio"/> | <input type="radio"/> |
| 6  | I could see my problems in a new light.                                            | <input type="radio"/> | <input type="radio"/> | <input type="radio"/> | <input type="radio"/> | <input type="radio"/> | <input type="radio"/> |
| 7  | I became aware of the beautiful things in my life.                                 | <input type="radio"/> | <input type="radio"/> | <input type="radio"/> | <input type="radio"/> | <input type="radio"/> | <input type="radio"/> |
| 8  | I gained confidence in my ability to handle strong feelings.                       | <input type="radio"/> | <input type="radio"/> | <input type="radio"/> | <input type="radio"/> | <input type="radio"/> | <input type="radio"/> |
| 9  | I was confronted with my problems.                                                 | <input type="radio"/> | <input type="radio"/> | <input type="radio"/> | <input type="radio"/> | <input type="radio"/> | <input type="radio"/> |
| 10 | I felt comfortable with my therapist(s).                                           | <input type="radio"/> | <input type="radio"/> | <input type="radio"/> | <input type="radio"/> | <input type="radio"/> | <input type="radio"/> |
| 11 | I felt in contact with my strengths.                                               | <input type="radio"/> | <input type="radio"/> | <input type="radio"/> | <input type="radio"/> | <input type="radio"/> | <input type="radio"/> |
| 12 | I made progress in coping with my problems.                                        | <input type="radio"/> | <input type="radio"/> | <input type="radio"/> | <input type="radio"/> | <input type="radio"/> | <input type="radio"/> |

**Please also complete the next page →**

|    |                                                                                              | not at all            | a little              | moderately            | strongly              | very strongly         | extremely             |
|----|----------------------------------------------------------------------------------------------|-----------------------|-----------------------|-----------------------|-----------------------|-----------------------|-----------------------|
| 13 | I felt supported by my therapist(s).                                                         | <input type="radio"/> | <input type="radio"/> | <input type="radio"/> | <input type="radio"/> | <input type="radio"/> | <input type="radio"/> |
| 14 | I experienced feelings that I previously avoided.                                            | <input type="radio"/> | <input type="radio"/> | <input type="radio"/> | <input type="radio"/> | <input type="radio"/> | <input type="radio"/> |
| 15 | It became clearer to me why I tend to react in certain ways to certain difficult situations. | <input type="radio"/> | <input type="radio"/> | <input type="radio"/> | <input type="radio"/> | <input type="radio"/> | <input type="radio"/> |
| 16 | I learned about new and useful ways to act.                                                  | <input type="radio"/> | <input type="radio"/> | <input type="radio"/> | <input type="radio"/> | <input type="radio"/> | <input type="radio"/> |
| 17 | I felt safe with my therapist(s).                                                            | <input type="radio"/> | <input type="radio"/> | <input type="radio"/> | <input type="radio"/> | <input type="radio"/> | <input type="radio"/> |
| 18 | I felt connected to things that give my life meaning.                                        | <input type="radio"/> | <input type="radio"/> | <input type="radio"/> | <input type="radio"/> | <input type="radio"/> | <input type="radio"/> |
| 19 | I relived painful or fearful memories.                                                       | <input type="radio"/> | <input type="radio"/> | <input type="radio"/> | <input type="radio"/> | <input type="radio"/> | <input type="radio"/> |
| 20 | I gained a new understanding of the difficulties in my life.                                 | <input type="radio"/> | <input type="radio"/> | <input type="radio"/> | <input type="radio"/> | <input type="radio"/> | <input type="radio"/> |
| 21 | I became aware of things that I am thankful for.                                             | <input type="radio"/> | <input type="radio"/> | <input type="radio"/> | <input type="radio"/> | <input type="radio"/> | <input type="radio"/> |
| 22 | I felt connected to my therapist(s).                                                         | <input type="radio"/> | <input type="radio"/> | <input type="radio"/> | <input type="radio"/> | <input type="radio"/> | <input type="radio"/> |
| 23 | I learned things that can help me handle difficult situations.                               | <input type="radio"/> | <input type="radio"/> | <input type="radio"/> | <input type="radio"/> | <input type="radio"/> | <input type="radio"/> |
| 24 | I could understand my feelings on a deeper level.                                            | <input type="radio"/> | <input type="radio"/> | <input type="radio"/> | <input type="radio"/> | <input type="radio"/> | <input type="radio"/> |
| 25 | I could feel that my vulnerable spots were being touched upon.                               | <input type="radio"/> | <input type="radio"/> | <input type="radio"/> | <input type="radio"/> | <input type="radio"/> | <input type="radio"/> |

## GCMQ-25-CL

Hier ist eine Liste von Aussagen, die möglicherweise auf Ihre Therapiesitzung zutreffen. Bitte schätzen Sie den Umfang ein, in dem diese Aussagen auf Ihre Therapiesitzung zutreffen.

|    |                                                                                                              | überhaupt nicht       | ein wenig             | mäßig                 | stark                 | sehr stark            | extrem                |
|----|--------------------------------------------------------------------------------------------------------------|-----------------------|-----------------------|-----------------------|-----------------------|-----------------------|-----------------------|
| 1  | Ich spürte Emotionen, die mit meinen Problemen zusammenhängen.                                               | <input type="radio"/> | <input type="radio"/> | <input type="radio"/> | <input type="radio"/> | <input type="radio"/> | <input type="radio"/> |
| 2  | Es wurde mir klarer, was der Kern meiner Probleme ist.                                                       | <input type="radio"/> | <input type="radio"/> | <input type="radio"/> | <input type="radio"/> | <input type="radio"/> | <input type="radio"/> |
| 3  | Ich konnte meiner Therapeutin/meinem Therapeuten/meinen Therapeut:innen vertrauen.                           | <input type="radio"/> | <input type="radio"/> | <input type="radio"/> | <input type="radio"/> | <input type="radio"/> | <input type="radio"/> |
| 4  | Ich konnte mich selbst in einem positiven Licht sehen.                                                       | <input type="radio"/> | <input type="radio"/> | <input type="radio"/> | <input type="radio"/> | <input type="radio"/> | <input type="radio"/> |
| 5  | Ich habe neue Wege gefunden, mit Situationen umzugehen, die mir in der Vergangenheit Probleme gemacht haben. | <input type="radio"/> | <input type="radio"/> | <input type="radio"/> | <input type="radio"/> | <input type="radio"/> | <input type="radio"/> |
| 6  | Ich konnte meine Probleme in einem neuen Licht sehen.                                                        | <input type="radio"/> | <input type="radio"/> | <input type="radio"/> | <input type="radio"/> | <input type="radio"/> | <input type="radio"/> |
| 7  | Ich bin mir der schönen Dinge in meinem Leben bewusst geworden.                                              | <input type="radio"/> | <input type="radio"/> | <input type="radio"/> | <input type="radio"/> | <input type="radio"/> | <input type="radio"/> |
| 8  | Ich habe Vertrauen in meine Fähigkeit gewonnen, mit starken Gefühlen umzugehen.                              | <input type="radio"/> | <input type="radio"/> | <input type="radio"/> | <input type="radio"/> | <input type="radio"/> | <input type="radio"/> |
| 9  | Ich wurde mit meinen Problemen konfrontiert.                                                                 | <input type="radio"/> | <input type="radio"/> | <input type="radio"/> | <input type="radio"/> | <input type="radio"/> | <input type="radio"/> |
| 10 | Ich habe mich mit meiner Therapeutin/meinem Therapeuten/meinen Therapeut:innen wohl gefühlt.                 | <input type="radio"/> | <input type="radio"/> | <input type="radio"/> | <input type="radio"/> | <input type="radio"/> | <input type="radio"/> |
| 11 | Ich fühlte mich im Kontakt mit meinen Stärken.                                                               | <input type="radio"/> | <input type="radio"/> | <input type="radio"/> | <input type="radio"/> | <input type="radio"/> | <input type="radio"/> |
| 12 | Ich habe Fortschritte bei der Bewältigung meiner Probleme gemacht.                                           | <input type="radio"/> | <input type="radio"/> | <input type="radio"/> | <input type="radio"/> | <input type="radio"/> | <input type="radio"/> |

**Bitte füllen Sie auch die nächste Seite aus →**

|    |                                                                                                                              | überhaupt<br>nicht    | ein wenig             | mäßig                 | stark                 | sehr stark            | extrem                |
|----|------------------------------------------------------------------------------------------------------------------------------|-----------------------|-----------------------|-----------------------|-----------------------|-----------------------|-----------------------|
| 13 | Ich habe mich von meiner Therapeutin/<br>meinem Therapeuten/meinen<br>Therapeut:innen unterstützt gefühlt.                   | <input type="radio"/> | <input type="radio"/> | <input type="radio"/> | <input type="radio"/> | <input type="radio"/> | <input type="radio"/> |
| 14 | Ich habe Gefühle erlebt, die ich zuvor<br>vermieden habe.                                                                    | <input type="radio"/> | <input type="radio"/> | <input type="radio"/> | <input type="radio"/> | <input type="radio"/> | <input type="radio"/> |
| 15 | Mir ist klarer geworden, warum ich in<br>bestimmten schwierigen Situationen dazu<br>neige, auf bestimmte Weise zu reagieren. | <input type="radio"/> | <input type="radio"/> | <input type="radio"/> | <input type="radio"/> | <input type="radio"/> | <input type="radio"/> |
| 16 | Ich habe nützliche neue<br>Handlungsmöglichkeiten kennengelernt.                                                             | <input type="radio"/> | <input type="radio"/> | <input type="radio"/> | <input type="radio"/> | <input type="radio"/> | <input type="radio"/> |
| 17 | Ich habe mich sicher gefühlt mit meiner<br>Therapeutin/meinem Therapeuten/<br>meinen Therapeut:innen.                        | <input type="radio"/> | <input type="radio"/> | <input type="radio"/> | <input type="radio"/> | <input type="radio"/> | <input type="radio"/> |
| 18 | Ich habe mich Dingen verbunden gefühlt,<br>die meinem Leben Sinn geben.                                                      | <input type="radio"/> | <input type="radio"/> | <input type="radio"/> | <input type="radio"/> | <input type="radio"/> | <input type="radio"/> |
| 19 | Ich habe schmerzhaft oder angstvolle<br>Erinnerungen wiedererlebt.                                                           | <input type="radio"/> | <input type="radio"/> | <input type="radio"/> | <input type="radio"/> | <input type="radio"/> | <input type="radio"/> |
| 20 | Ich habe ein neues Verständnis für die<br>Schwierigkeiten in meinem Leben<br>gewonnen.                                       | <input type="radio"/> | <input type="radio"/> | <input type="radio"/> | <input type="radio"/> | <input type="radio"/> | <input type="radio"/> |
| 21 | Mir wurden Dinge bewusst, für die ich<br>dankbar bin.                                                                        | <input type="radio"/> | <input type="radio"/> | <input type="radio"/> | <input type="radio"/> | <input type="radio"/> | <input type="radio"/> |
| 22 | Ich habe mich mit meiner Therapeutin/<br>meinem Therapeuten/meinen<br>Therapeut:innen verbunden gefühlt.                     | <input type="radio"/> | <input type="radio"/> | <input type="radio"/> | <input type="radio"/> | <input type="radio"/> | <input type="radio"/> |
| 23 | Ich habe Dinge gelernt, die mir dabei<br>helfen können, mit schwierigen<br>Situationen umzugehen.                            | <input type="radio"/> | <input type="radio"/> | <input type="radio"/> | <input type="radio"/> | <input type="radio"/> | <input type="radio"/> |
| 24 | Ich konnte meine Gefühle auf einer<br>tieferen Ebene verstehen.                                                              | <input type="radio"/> | <input type="radio"/> | <input type="radio"/> | <input type="radio"/> | <input type="radio"/> | <input type="radio"/> |
| 25 | Ich konnte spüren, dass meine<br>verletzlichen Stellen berührt wurden.                                                       | <input type="radio"/> | <input type="radio"/> | <input type="radio"/> | <input type="radio"/> | <input type="radio"/> | <input type="radio"/> |
